# Supplementary material for: Comparative Burkholderia pseudomallei natural history virulence studies using an aerosol murine model of infection
Source: PubMed Central journal article supplement — Sci Rep. 2014 Mar 7;4:4305. doi: 10.1038/srep04305 (PMC3945929; doi:10.1038/srep04305), 2014-03-07
Supplement: srep04305-s1.pdf [file srep04305-s1.pdf]

Supplementary information and material:

**Comparative *Burkholderia pseudomallei* natural history virulence studies using an aerosol murine model of infection.**

Shane Massey<sup>1</sup>, Linsey A. Yeager<sup>1,3</sup>, Carla A. Blumentritt<sup>1</sup>, Sudhamathi Vijayakumar<sup>1</sup>, Elena Sbrana<sup>1,2</sup>, Johnny W. Peterson<sup>1,3</sup>, Trevor Brasel<sup>1,3</sup>, James W. LeDuc<sup>1,3</sup>, Janice J. Endsley<sup>1,2</sup>, Alfredo G. Torres<sup>1,2\*</sup>

<sup>1</sup>Department of Microbiology and Immunology, <sup>2</sup> Department of Pathology, <sup>3</sup> Galveston National Laboratory, University of Texas Medical Branch, Galveston, TX, 77555

## **SUPPLEMENTAL FIGURE LEGENDS**

### **Supplemental Figure 1. Gross pathological progression of melioidosis in mice.**

Representative images of organs during each of the three stages of melioidosis infection.

### **Supplemental Figure 2. Chemokine/cytokine analysis from homogenized lung tissue.**

Levels of G-CSF, KC, IL-6, MCP-1, IL-17 and TNF- $\alpha$  in homogenized lung tissue (pg/ml) of animals infected with HB PUB10303a (closed circles) or K96243 (closed triangles) compared to the uninfected control animals (dashed line). The symbols represent values of individual animals. The bars indicate the mean for each group and the dashed line represents the mean for the uninfected control animals. The asterisk (\*) indicates significantly different values when comparing HB PUB10303a to the uninfected control animals,  $p < 0.05$ . The single cross (†) represents significantly different values when comparing K96243 to the uninfected controls,  $p < 0.05$ . The double cross (‡) indicates significantly different values when comparing HB PUB10303a to K96243,  $p < 0.05$ .

Stage

Lung

Spleen

Liver

1

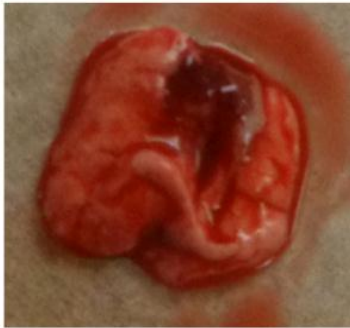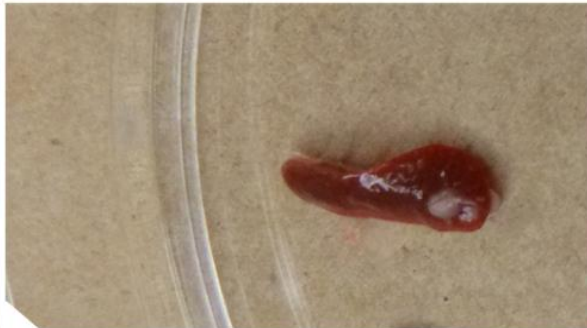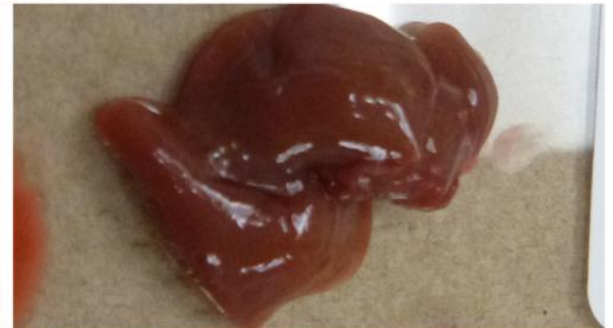

2

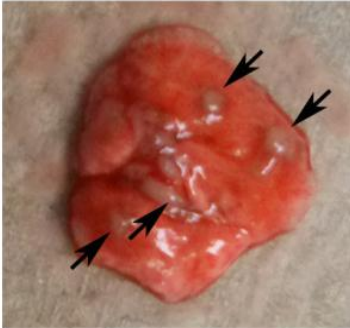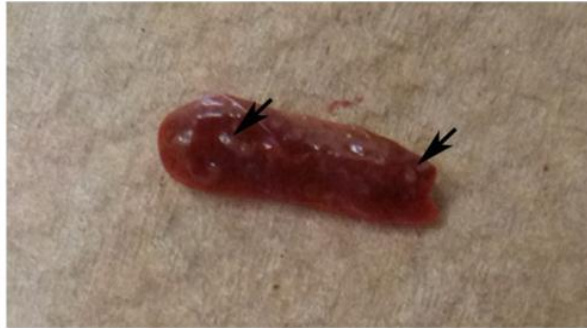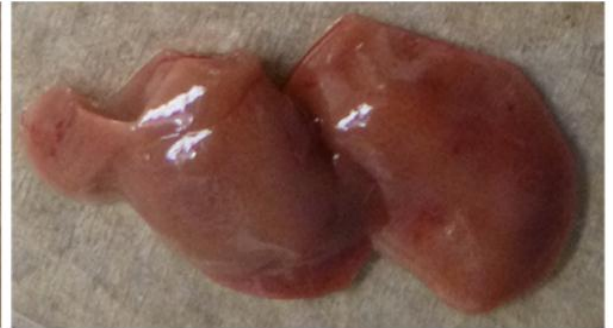

3

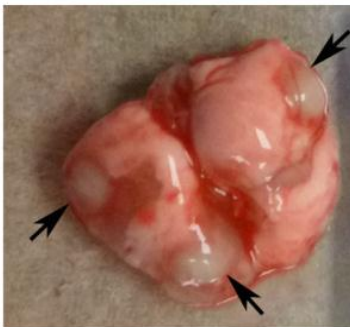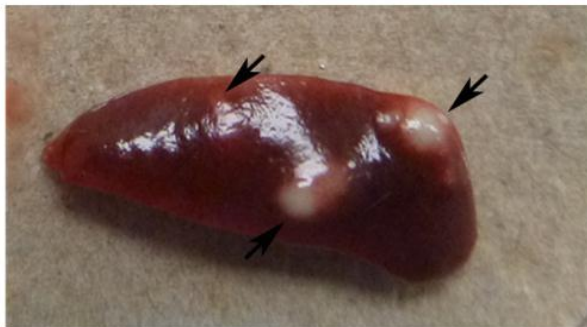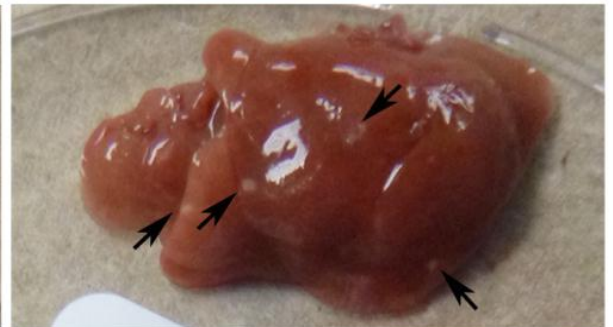

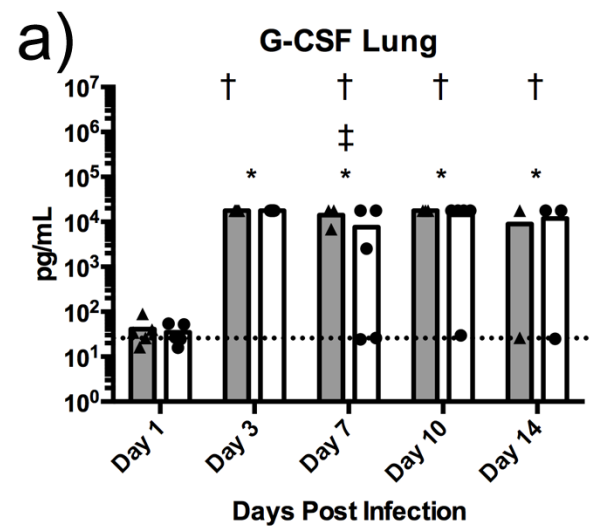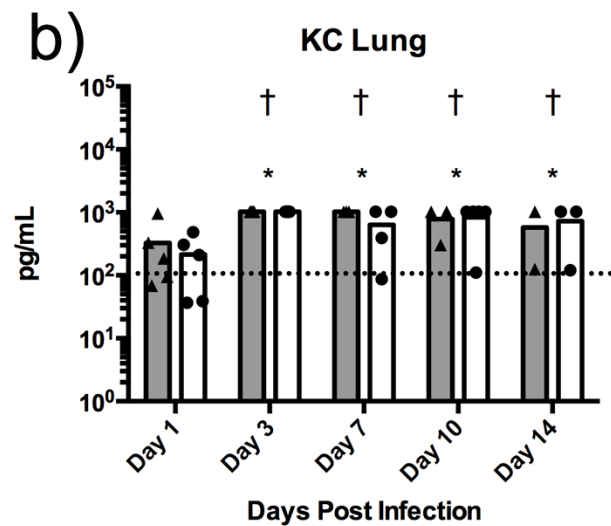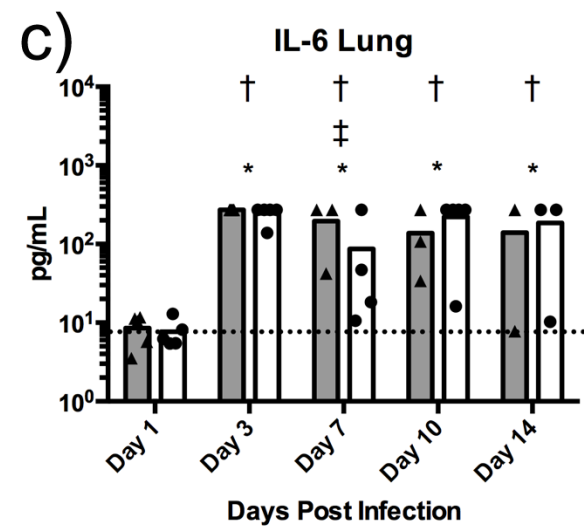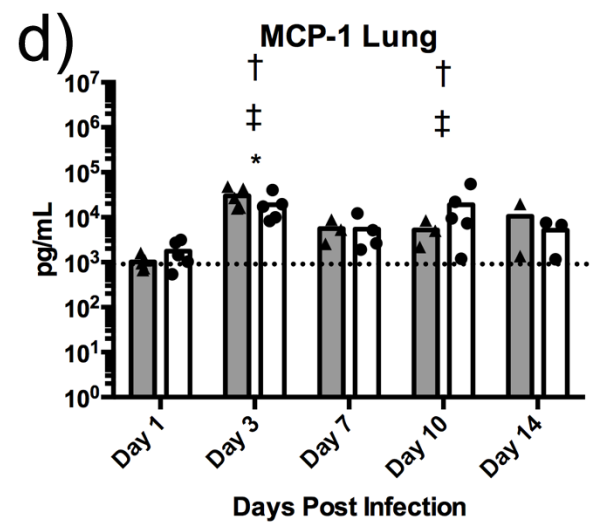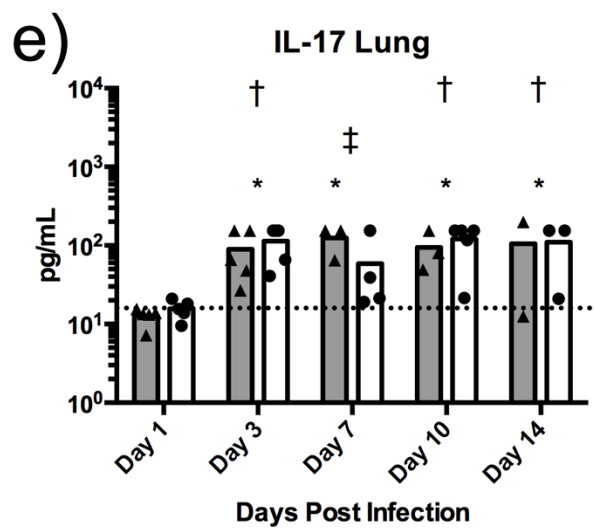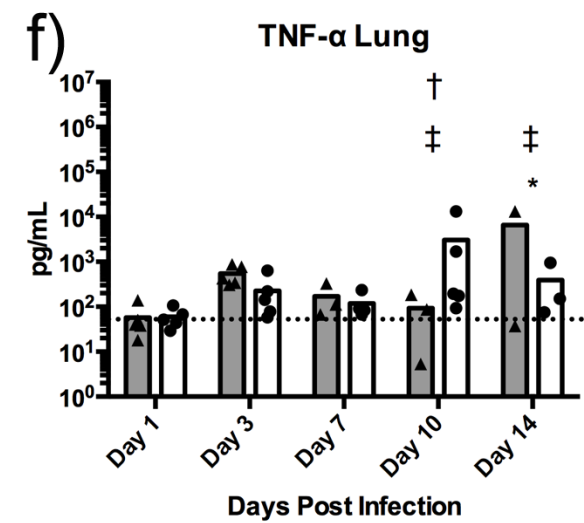

Supplemental Table 1: Blood Chemistry and Hematology

|                        |              | Control        | HB PUB10303a            |                           |                            |                           |                          | K96243                 |                         |                            |                            |                           |
|------------------------|--------------|----------------|-------------------------|---------------------------|----------------------------|---------------------------|--------------------------|------------------------|-------------------------|----------------------------|----------------------------|---------------------------|
|                        |              |                | Day 1                   | Day 3                     | Day 7                      | Day 10                    | Day 14                   | Day 1                  | Day 3                   | Day 7                      | Day 10                     | Day 14                    |
|                        |              | (n=22)         | (n=8-10)                | (n=6-10)                  | (n=6-9)                    | (n=5-8)                   | (n=2-7)                  | (n=9-10)               | (n=7-10)                | (n=4-9)                    | (n=3-8)                    | (n=2-7)                   |
| <b>Leukocytes</b>      |              |                |                         |                           |                            |                           |                          |                        |                         |                            |                            |                           |
| WBC                    | (K/ $\mu$ L) | 3.90±0.37      | 3.48±0.88               | 6.35±0.76                 | 7.32±1.00 <sup>a</sup>     | 8.43±0.86 <sup>b</sup>    | 6.28±2.09                | 6.93±0.91 <sup>b</sup> | 5.39±1.09               | 6.95±1.02 <sup>a</sup>     | 8.32±0.83 <sup>d</sup>     | 4.46±0.93                 |
| LY                     | (K/ $\mu$ L) | 2.69±0.28      | 2.62±0.64               | 2.52±0.27                 | 3.14±0.43                  | 2.04±0.23                 | 4.02±2.13                | 4.62±0.60 <sup>b</sup> | 2.71±0.76               | 3.49±0.54                  | 3.19±0.64                  | 2.00±0.45                 |
| MO                     | (K/ $\mu$ L) | 0.19±0.02      | 0.13±0.03               | 0.31±0.05                 | 0.45±0.06 <sup>c</sup>     | 0.50±0.2 <sup>d</sup>     | 0.49±0.10 <sup>c</sup>   | 0.31±0.03              | 0.22±0.06               | 0.27±0.04                  | 0.45±0.07 <sup>d</sup>     | 0.24±0.09                 |
| EO                     | (K/ $\mu$ L) | 0.10±0.03      | 0.08±0.03               | 0.30±0.06 <sup>b</sup>    | 0.22±0.07                  | 0.26±0.13                 | 0.11±0.02                | 0.21±0.04              | 0.13±0.06               | 0.17±0.07                  | 0.12±0.03                  | 0.08±0.03                 |
| BA                     | (K/ $\mu$ L) | 0.04±0.01      | 0.03±0.01               | 0.09±0.02                 | 0.06±0.02                  | 0.10±0.06                 | 0.01±0.01                | 0.06±0.01              | 0.04±0.02               | 0.04±0.02                  | 0.03±0.01                  | 0.02±0.01                 |
| NE                     | (%)          | 22.60±2.23     | 14.72±2.01              | 47.20±3.55 <sup>d</sup>   | 46.13±4.04 <sup>c</sup>    | 65.65±4.75 <sup>d</sup>   | 34.65±7.52               | 24.00±1.67             | 44.26±5.26 <sup>d</sup> | 41.24±5.00 <sup>c</sup>    | 53.11±6.45 <sup>d</sup>    | 41.62±8.17 <sup>b</sup>   |
| LY                     | (%)          | 68.93±2.50     | 78.38±2.08              | 41.83±3.17 <sup>d</sup>   | 43.23±3.69 <sup>c</sup>    | 24.78±3.05 <sup>d</sup>   | 51.94±9.80               | 67.52±1.78             | 48.35±4.01 <sup>c</sup> | 51.84±4.96 <sup>a</sup>    | 39.15±6.57 <sup>d</sup>    | 51.02±8.46 <sup>a</sup>   |
| MO                     | (%)          | 4.91±0.50      | 4.47±0.53               | 5.34±0.93                 | 7.06±1.52                  | 5.61±2.16                 | 9.98±1.71 <sup>b</sup>   | 4.91±0.62              | 4.55±0.81               | 4.40±0.95                  | 5.48±0.77                  | 5.41±1.28                 |
| EO                     | (%)          | 2.59±0.74      | 1.74±0.38               | 4.43±0.63                 | 2.84±0.71                  | 2.90±1.48                 | 3.11±1.36                | 2.81±0.36              | 2.10±0.53               | 2.01±0.60                  | 1.79±0.65                  | 1.57±0.43                 |
| BA                     | (%)          | 0.98±0.28      | 0.69±0.11               | 1.21±0.21                 | 0.74±0.18                  | 1.05±0.61                 | 0.33±0.11                | 0.76±0.13              | 0.74±0.25               | 0.51±0.19                  | 1.48±0.21                  | 0.27±0.13                 |
| <b>Erythrocytes</b>    |              |                |                         |                           |                            |                           |                          |                        |                         |                            |                            |                           |
| RBC                    | (M/ $\mu$ L) | 7.16±0.40      | 6.30±0.75               | 8.28±0.74                 | 7.83±0.17                  | 7.95±0.24                 | 5.33±1.22                | 8.52±0.31              | 8.76±0.88               | 8.38±0.42                  | 8.20±0.33                  | 6.78±0.85                 |
| HGB                    | (g/dL)       | 10.30±0.82     | 9.61±0.94               | 12.27±1.10                | 11.58±0.24                 | 11.24±0.41                | 13.04±2.53               | 12.69±0.41             | 13.84±0.29              | 12.36±0.56                 | 12.23±0.50                 | 9.89±1.22                 |
| HCT                    | (%)          | 37.32±2.14     | 33.09±3.95              | 42.30±3.80                | 39.02±0.42                 | 38.50±1.43                | 24.90±5.68               | 45.12±1.69             | 45.69±4.63              | 42.27±2.02                 | 40.95±1.81                 | 33.87±4.33                |
| MCV                    | (fL)         | 51.99±0.25     | 52.36±0.77              | 50.90±0.38                | 49.90±0.59 <sup>a</sup>    | 48.40±0.40 <sup>d</sup>   | 46.68±1.24 <sup>d</sup>  | 52.93±0.19             | 52.06±0.28              | 50.58±1.78                 | 49.88±0.51 <sup>a</sup>    | 49.97±0.47 <sup>a</sup>   |
| MCH                    | (pg)         | 13.76±0.82     | 15.91±0.80              | 14.75±0.12                | 14.82±.20                  | 14.10±0.17                | 19.73±6.13 <sup>a</sup>  | 14.91±0.16             | 14.51±0.11              | 14.78±0.27                 | 14.94±0.16                 | 14.70±0.41                |
| MCHC                   | (K/ $\mu$ L) | 26.40±1.57     | 30.49±1.70              | 29.01±0.18                | 29.67±0.38                 | 29.22±0.32                | 40.98±11.10 <sup>b</sup> | 28.19±0.26             | 27.80±0.28              | 29.27±0.31                 | 29.99±0.25                 | 29.46±0.69                |
| RDW                    | (K/ $\mu$ L) | 16.93±0.16     | 1.99±1.29               | 17.62±0.25                | 18.32±0.58                 | 19.36±0.27                | 20.30±1.06               | 17.43±0.18             | 17.63±0.34              | 18.00±0.44                 | 18.81±0.48                 | 19.17±0.77                |
| <b>Thrombocytes</b>    |              |                |                         |                           |                            |                           |                          |                        |                         |                            |                            |                           |
| PLT                    | (K/ $\mu$ L) | 247.65±49.86   | 200.50±51.58            | 225.00±35.54              | 604.67±130.48 <sup>a</sup> | 760±89.67 <sup>c</sup>    | 269.40±128.66            | 270.50±59.89           | 449.00±68.910           | 743.56±122.84 <sup>d</sup> | 576.88±146.73 <sup>a</sup> | 384.29±91.64              |
| MPV                    | (fL)         | 5.05±0.10      | 5.610±0.18 <sup>a</sup> | 5.34±0.08                 | 5.13±0.10                  | 5.04±0.18                 | 5.62±0.31                | 5.07±0.10              | 5.13±0.14               | 5.16±0.17                  | 5.09±0.18                  | 5.56±0.20                 |
| <b>Blood Chemistry</b> |              |                |                         |                           |                            |                           |                          |                        |                         |                            |                            |                           |
| ALT                    | (u/L)        | 79.14±14.61    | 156.67±76.97            | 139.00±54.61              | 45.86±17.63                | 54.00±16.86               | 252.00±224.00            | 43.44±7.48             | 33.11±3.098             | 35.00±3.59                 | 42.88±11.90                | 50.00±21.48               |
| AMY                    | (u/L)        | 1298.64±155.10 | 912.22±37.09            | 937.88±66.98              | 671.14±46.32               | 688.80±126.42             | 1028.50±369.50           | 972.45±24.22           | 812.22±45.11            | 805.00±92.07               | 771.50±73.94               | 855.83±74.39              |
| TBIL                   | (mg/dL)      | 0.33±0.01      | 0.30±0.02               | 0.29±0.01                 | 0.30±0.00                  | 0.30±0.00                 | 0.30±0.00                | 0.31±0.01              | 0.31±0.01               | 0.29±0.01                  | 0.30±0.00                  | 0.30±0.00                 |
| BUN                    | (mg/dL)      | 16.55±0.62     | 18.33±1.30              | 14.70±1.04                | 13.43±1.40                 | 13.60±0.68                | 16.00±2.00               | 17.33±0.80             | 16.44±1.10              | 14.75±0.92                 | 18.25±3.42                 | 17.50±1.61                |
| CA                     | (mg/dL)      | 8.95±0.33      | 8.29±0.74               | 9.21±0.65                 | 10.29±0.54                 | 7.66±0.87                 | 7.00±3.00                | 9.97±0.22              | 10.43±0.18              | 10.03±0.21                 | 10.36±0.61                 | 10.65±0.67                |
| PHOS                   | (mg/dL)      | 7.68±0.48      | 7.90±0.33               | 7.34±0.50                 | 7.54±0.55                  | 6.64±0.64                 | 8.95±1.45                | 8.09±0.45              | 7.38±0.28               | 6.30±0.44                  | 7.35±0.44                  | 7.13±0.43                 |
| CRE                    | (mg/dL)      | 0.21±0.02      | 0.21±0.01               | 0.23±0.03                 | 0.26±0.04                  | 0.20±0.00                 | 0.20±0.00                | 0.23±0.02              | 0.20±0.00               | 0.20±0.00                  | 0.24±0.02                  | 0.23±0.02                 |
| GLU                    | (mg/dL)      | 217.46±6.25    | 235.33±9.67             | 149.40±12.50 <sup>d</sup> | 138.29±21.39 <sup>d</sup>  | 128.60±14.72 <sup>d</sup> | 159.00±61.00             | 234.00±10.30           | 208.33±13.25            | 174.88±19.25               | 156.25±14.35 <sup>c</sup>  | 156.50±20.45 <sup>b</sup> |
| NA+                    | (mMol/L)     | 146.55±0.67    | 149.33±2.05             | 146.14±0.97               | 144.43±1.70                | 147.40±1.25               | 153.50±5.50              | 144.44±0.69            | 144.44±0.73             | 145.86±0.77                | 150.13±4.45                | 148.67±6.86               |
| K+                     | (mMol/L)     | 6.04±0.28      | 6.64±0.24               | 6.35±0.21                 | 5.75±0.50                  | 7.26±0.51                 | 6.85±1.15                | 5.62±0.16              | 5.68±0.18               | 5.66±0.24                  | 5.50±0.26                  | 6.28±0.46                 |
| TP                     | (g/dL)       | 4.77±0.07      | 4.58±0.06               | 5.90±0.28 <sup>d</sup>    | 5.73±0.20 <sup>d</sup>     | 5.82±0.27 <sup>c</sup>    | 5.25±0.05                | 4.87±0.05              | 5.72±0.16 <sup>d</sup>  | 5.16±0.14                  | 5.69±0.30 <sup>d</sup>     | 5.80±0.50 <sup>d</sup>    |

<sup>a</sup>P<0.05<sup>b</sup>P<0.01<sup>c</sup>P<0.0005<sup>d</sup>P<0.0001

**Supplemental Table 2: Blood Serum Chemokines/Cytokines**

| Cytokine<br>(pg/mL) | Control              | HB PUB10303a         |                                 |                                    |                                  |                                  | K96243               |                     |                                 |                               |                       |
|---------------------|----------------------|----------------------|---------------------------------|------------------------------------|----------------------------------|----------------------------------|----------------------|---------------------|---------------------------------|-------------------------------|-----------------------|
|                     | (n=18)               | Day 1 (n=8)          | Day 3 (n=9)                     | Day 7 (n=5)                        | Day 10 (n=4)                     | Day 14 (n=4)                     | Day 1 (n=9)          | Day 3 (n=8)         | Day 7 (n=8)                     | Day 10 (n=6)                  | Day 14 (n=6)          |
| IL-1 $\beta$        | 124.10 $\pm$ 9.96    | 125.26 $\pm$ 12.68   | 167.57 $\pm$ 21.26              | 248.76 $\pm$ 17.36                 | 449.99 $\pm$ 271.01 <sup>d</sup> | 287.79 $\pm$ 225.79 <sup>a</sup> | 159.53 $\pm$ 7.02    | 195.55 $\pm$ 25.22  | 182.13 $\pm$ 27.64              | 170.15 $\pm$ 11.49            | 134.39 $\pm$ 20.51    |
| IL-2                | 18.95 $\pm$ 3.50     | 20.43 $\pm$ 3.31     | 11.43 $\pm$ 3.95                | 36.42 $\pm$ 7.77 <sup>a</sup>      | 23.82 $\pm$ 9.00                 | 15.99 $\pm$ 8.55                 | 29.75 $\pm$ 2.39     | 25.39 $\pm$ 3.11    | 27.23 $\pm$ 4.00                | 31.95 $\pm$ 4.89              | 30.18 $\pm$ 8.64      |
| IL-3                | 6.79 $\pm$ 1.85      | 2.15 $\pm$ 0.98      | 2.24 $\pm$ 1.41                 | 12.02 $\pm$ 3.56                   | 0.50 $\pm$ 0.40                  | 2.76 $\pm$ 2.31                  | 9.76 $\pm$ 3.02      | 2.01 $\pm$ 0.49     | 7.61 $\pm$ 1.53                 | 3.60 $\pm$ 1.59               | 4.28 $\pm$ 1.36       |
| IL-5                | 17.61 $\pm$ 3.18     | 11.11 $\pm$ 1.85     | 12.04 $\pm$ 3.65                | 39.08 $\pm$ 7.65 <sup>b</sup>      | 19.36 $\pm$ 3.78                 | 11.21 $\pm$ 7.12                 | 17.40 $\pm$ 3.25     | 10.98 $\pm$ 2.91    | 28.79 $\pm$ 6.84                | 18.65 $\pm$ 4.53              | 20.36 $\pm$ 6.62      |
| IL-9                | 181.12 $\pm$ 52.89   | 56.98 $\pm$ 56.89    | 13.78 $\pm$ 13.68               | 375.09 $\pm$ 62.99                 | 75.47 $\pm$ 75.37                | 167.59 $\pm$ 129.75              | 261.13 $\pm$ 54.68   | 193.24 $\pm$ 73.89  | 259.41 $\pm$ 90.50              | 253.51 $\pm$ 69.85            | 382.58 $\pm$ 90.13    |
| IL-10               | 24.71 $\pm$ 3.81     | 17.87 $\pm$ 3.34     | 49.37 $\pm$ 6.18 <sup>b</sup>   | 76.70 $\pm$ 11.03 <sup>c</sup>     | 55.75 $\pm$ 16.67 <sup>b</sup>   | 39.84 $\pm$ 21.56                | 30.42 $\pm$ 5.27     | 34.56 $\pm$ 7.61    | 48.64 $\pm$ 12.80 <sup>b</sup>  | 30.50 $\pm$ 6.09              | 25.05 $\pm$ 6.37      |
| IL-12(p40)          | 1042.72 $\pm$ 122.98 | 1050.44 $\pm$ 180.39 | 986.10 $\pm$ 143.77             | 2674.69 $\pm$ 1126.46 <sup>d</sup> | 1250.51 $\pm$ 351.74             | 1130.83 $\pm$ 638.77             | 690.74 $\pm$ 113.47  | 648.35 $\pm$ 158.53 | 1138.56 $\pm$ 194.34            | 870.58 $\pm$ 243.61           | 938.54 $\pm$ 247.94   |
| IL-12(p70)          | 92.07 $\pm$ 13.99    | 73.47 $\pm$ 9.09     | 135.24 $\pm$ 48.69              | 138.35 $\pm$ 24.35                 | 103.85 $\pm$ 30.77               | 81.61 $\pm$ 23.67                | 127.52 $\pm$ 20.67   | 92.29 $\pm$ 11.06   | 119.62 $\pm$ 19.69              | 84.90 $\pm$ 7.50              | 91.86 $\pm$ 22.36     |
| IL-13               | 2459.29 $\pm$ 215.21 | 2275.28 $\pm$ 127.67 | 2003.43 $\pm$ 169.05            | 3308.34 $\pm$ 358.74               | 2345.99 $\pm$ 248.05             | 1468.36 $\pm$ 746.05             | 2699.23 $\pm$ 168.83 | 2154.79 $\pm$ 65.53 | 2751.02 $\pm$ 196.95            | 2543.45 $\pm$ 224.53          | 3394.54 $\pm$ 1134.18 |
| Eotaxin             | 554.50 $\pm$ 96.18   | 212.69 $\pm$ 73.75   | 659.61 $\pm$ 224.93             | 1122.03 $\pm$ 170.47 <sup>a</sup>  | 595.13 $\pm$ 241.24              | 315.34 $\pm$ 183.09              | 930.20 $\pm$ 143.98  | 736.59 $\pm$ 126.14 | 772.79 $\pm$ 147.92             | 520.80 $\pm$ 96.66            | 231.94 $\pm$ 128.63   |
| GM-CSF              | 121.42 $\pm$ 32.64   | 61.80 $\pm$ 25.21    | 133.22 $\pm$ 35.12              | 380.95 $\pm$ 38.98 <sup>c</sup>    | 280.67 $\pm$ 108.61              | 204.91 $\pm$ 105.35              | 209.50 $\pm$ 40.68   | 155.99 $\pm$ 41.31  | 254.20 $\pm$ 62.82 <sup>a</sup> | 153.55 $\pm$ 39.84            | 151.27 $\pm$ 63.44    |
| IFN- $\gamma$       | 27.01 $\pm$ 5.21     | 11.02 $\pm$ 3.00     | 121.36 $\pm$ 23.83 <sup>d</sup> | 49.28 $\pm$ 7.33                   | 107.36 $\pm$ 59.99 <sup>c</sup>  | 99.69 $\pm$ 69.18 <sup>b</sup>   | 31.58 $\pm$ 8.20     | 43.94 $\pm$ 9.75    | 34.10 $\pm$ 6.01                | 21.88 $\pm$ 5.64              | 36.92 $\pm$ 9.12      |
| MIP-1 $\alpha$      | 57.52 $\pm$ 9.91     | 43.73 $\pm$ 7.08     | 50.82 $\pm$ 10.67               | 76.53 $\pm$ 12.84                  | 56.91 $\pm$ 17.38                | 53.08 $\pm$ 248.47               | 55.38 $\pm$ 10.10    | 31.84 $\pm$ 5.49    | 47.22 $\pm$ 5.33                | 31.75 $\pm$ 8.73              | 32.88 $\pm$ 10.98     |
| MIP-1 $\beta$       | 24.61 $\pm$ 3.96     | 17.15 $\pm$ 3.04     | 49.92 $\pm$ 4.88                | 57.84 $\pm$ 6.13                   | 213.48 $\pm$ 183.93 <sup>d</sup> | 82.48 $\pm$ 68.45                | 32.62 $\pm$ 5.00     | 34.49 $\pm$ 5.60    | 39.37 $\pm$ 7.86                | 31.20 $\pm$ 5.09              | 32.74 $\pm$ 8.38      |
| RANTES              | 48.51 $\pm$ 5.60     | 44.73 $\pm$ 6.44     | 61.56 $\pm$ 12.03               | 52.21 $\pm$ 10.97                  | 39.97 $\pm$ 17.86                | 23.96 $\pm$ 6.23                 | 32.97 $\pm$ 6.08     | 25.74 $\pm$ 8.89    | 49.25 $\pm$ 11.66               | 18.29 $\pm$ 6.33 <sup>a</sup> | 26.06 $\pm$ 8.99      |

<sup>a</sup>P<0.05

<sup>b</sup>P<0.01

<sup>c</sup>P<0.0005

<sup>d</sup>P<0.0001

**Supplemental Table 3: Lung Tissue Chemokines/Cytokines**

| Cytokine<br>(pg/mL) | Control               | HB PUB10303a            |                                  |                                  |                                  |                                        | K96243                  |                                 |                                  |                                        |                                  |
|---------------------|-----------------------|-------------------------|----------------------------------|----------------------------------|----------------------------------|----------------------------------------|-------------------------|---------------------------------|----------------------------------|----------------------------------------|----------------------------------|
|                     | (n=18)                | Day 1 (n=5)             | Day 3 (n=5)                      | Day 7 (n=4)                      | Day 10 (n=5)                     | Day 14 (n=3)                           | Day 1 (n=5)             | Day 3 (n=5)                     | Day 7 (n=3)                      | Day 10 (n=3)                           | Day 14 (n=2)                     |
| IL-1 $\alpha$       | 26.15 $\pm$ 2.22      | 22.37 $\pm$ 3.68        | 386.73 $\pm$ 0.00 <sup>d</sup>   | 386.730 $\pm$ 0.00 <sup>d</sup>  | 258.38 $\pm$ 128.33 <sup>d</sup> | 204.155 $\pm$ 185.58 <sup>b</sup>      | 33.52 $\pm$ 11.22       | 353.17 $\pm$ 33.56 <sup>d</sup> | 129.11 $\pm$ 86.03 <sup>a</sup>  | 317.38 $\pm$ 69.35 <sup>d</sup>        | 270.55 $\pm$ 116.18 <sup>d</sup> |
| IL-1 $\beta$        | 86.33 $\pm$ 24.58     | 114.55 $\pm$ 25.82      | 61473.51 $\pm$ 17454.14          | 52288.89 $\pm$ 5880.65           | 34731.27 $\pm$ 17812.29          | 140075.10 $\pm$ 139974.6 <sup>b</sup>  | 160.63 $\pm$ 91.96      | 47461.14 $\pm$ 17128.21         | 8347.76 $\pm$ 17128.21           | 279872.60 $\pm$ 96953.02 <sup>d</sup>  | 53832.40 $\pm$ 27282.33          |
| IL-3                | 0.92 $\pm$ 0.42       | 0.61 $\pm$ 0.42         | 0.87 $\pm$ 0.27                  | 3.73 $\pm$ 1.04 <sup>a</sup>     | 1.16 $\pm$ 0.56                  | 2.59 $\pm$ 1.80                        | 1.47 $\pm$ 0.79         | 1.00 $\pm$ 0.59                 | 2.90 $\pm$ 1.13                  | 3.20 $\pm$ 1.11 <sup>a</sup>           | 1.37 $\pm$ 0.34                  |
| IL-4                | 10.74 $\pm$ 3.25      | 9.62 $\pm$ 4.06         | 17.47 $\pm$ 1.75                 | 16.09 $\pm$ 1.86                 | 13.17 $\pm$ 3.87                 | 22.74 $\pm$ 15.05                      | 13.11 $\pm$ 5.09        | 15.33 $\pm$ 3.27                | 20.83 $\pm$ 3.76                 | 30.31 $\pm$ 4.73 <sup>b</sup>          | 22.65 $\pm$ 1.52                 |
| IL-5                | 40.57 $\pm$ 24.34     | 27.69 $\pm$ 17.36       | 10.71 $\pm$ 1.28                 | 8.83 $\pm$ 1.26                  | 5.99 $\pm$ 1.55                  | 28.01 $\pm$ 4.81                       | 65.85 $\pm$ 37.08       | 10.65 $\pm$ 1.29                | 52.22 $\pm$ 17.64                | 49.80 $\pm$ 17.33                      | 59.15 $\pm$ 22.47                |
| IL-9                | 301.72 $\pm$ 87.43    | 207.25 $\pm$ 113.68     | 71.04 $\pm$ 18.79                | 52.25 $\pm$ 0.00                 | 52.25 $\pm$ 0.00                 | 139.47 $\pm$ 27.27                     | 236.38 $\pm$ 62.12      | 281.89 $\pm$ 69.37              | 369.95 $\pm$ 118.75              | 216.55 $\pm$ 94.90                     | 126.45 $\pm$ 74.20               |
| IL-10               | 67.90 $\pm$ 26.77     | 46.26 $\pm$ 17.03       | 694.70 $\pm$ 414.01              | 72.99 $\pm$ 8.05                 | 29.35 $\pm$ 19.51                | 8505.93 $\pm$ 8494.29                  | 28.76 $\pm$ 9.51        | 120.62 $\pm$ 49.43              | 139.61 $\pm$ 39.54               | 122558.50 $\pm$ 122276.80 <sup>c</sup> | 103.60 $\pm$ 24.77               |
| IL-12(p40)          | 4805.54 $\pm$ 3209.67 | 28067.31 $\pm$ 27740.67 | 6542.86 $\pm$ 1852.98            | 11694.87 $\pm$ 3940.94           | 4433.38 $\pm$ 1871.29            | 5149.04 $\pm$ 3122.36                  | 20761.11 $\pm$ 13305.66 | 7308.06 $\pm$ 1921.53           | 27524.80 $\pm$ 16205.50          | 65060.79 $\pm$ 40451.08 <sup>c</sup>   | 39916.49 $\pm$ 15748.40          |
| IL-12(p70)          | 4.94 $\pm$ 3.05       | 6.90 $\pm$ 6.43         | 1113.71 $\pm$ 267.74             | 873.92 $\pm$ 309.01              | 879.47 $\pm$ 470.75              | 3606.20 $\pm$ 3605.73 <sup>c</sup>     | 3.872 $\pm$ 3.402       | 889.45 $\pm$ 456.74             | 563.24 $\pm$ 556.24              | 3430.47 $\pm$ 1745.29 <sup>d</sup>     | 669.85 $\pm$ 338.54              |
| IL-13               | 127.201 $\pm$ 28.03   | 105.08 $\pm$ 45.63      | 63.10 $\pm$ 7.47                 | 28.19 $\pm$ 5.05                 | 23.73 $\pm$ 5.22                 | 98.49 $\pm$ 26.50                      | 156.50 $\pm$ 50.94      | 99.52 $\pm$ 18.47               | 212.66 $\pm$ 63.72               | 153.55 $\pm$ 47.46                     | 99.88 $\pm$ 39.77                |
| Eotaxin             | 3631.74 $\pm$ 158.27  | 2902.33 $\pm$ 244.23    | 3072.81 $\pm$ 255.08             | 2658.10 $\pm$ 0.00               | 2658.10 $\pm$ 0.00               | 3680.69 $\pm$ 1022.59                  | 3329.27 $\pm$ 205.97    | 3689.60 $\pm$ 230.82            | 4051.78 $\pm$ 173.95             | 4437.49 $\pm$ 621.30                   | 3399.41 $\pm$ 371.55             |
| GM-CSF              | 47.75 $\pm$ 16.90     | 21.57 $\pm$ 17.33       | 474.17 $\pm$ 54.75 <sup>a</sup>  | 209.97 $\pm$ 63.82               | 121.23 $\pm$ 82.84               | 574.99 $\pm$ 570.75                    | 86.51 $\pm$ 33.08       | 372.97 $\pm$ 109.70             | 305.21 $\pm$ 153.15              | 984.34 $\pm$ 544.00 <sup>d</sup>       | 270.20 $\pm$ 81.92               |
| IFN- $\gamma$       | 8.65.00 $\pm$ 0.00    | 8.65.00 $\pm$ 0.00      | 874.98 $\pm$ 397.53 <sup>b</sup> | 902.19 $\pm$ 480.56 <sup>b</sup> | 636.33 $\pm$ 423.16              | 735.89 $\pm$ 727.21                    | 8.65.00 $\pm$ 0.00      | 315.91 $\pm$ 118.23             | 812.34 $\pm$ 803.69 <sup>b</sup> | 586.88 $\pm$ 251.38 <sup>a</sup>       | 791.97 $\pm$ 393.78 <sup>a</sup> |
| MIP-1 $\alpha$      | 48.75 $\pm$ 33.39     | 32.04 $\pm$ 22.81       | 217174.30 $\pm$ 105749.00        | 1244.82 $\pm$ 247.34             | 1038.84 $\pm$ 906.67             | 7.95e+015 $\pm$ 7.95e+015 <sup>d</sup> | 145.69 $\pm$ 64.92      | 302203.10 $\pm$ 262776.30       | 2086.09 $\pm$ 1241.10            | 6.36e+015 $\pm$ 3.90e+015 <sup>d</sup> | 90681.70 $\pm$ 46014.99          |
| MIP-1 $\beta$       | 25.14 $\pm$ 3.15      | 29.61 $\pm$ 11.16       | 947.93 $\pm$ 466.46              | 192.14 $\pm$ 48.58               | 82.05 $\pm$ 45.94                | 1390.34 $\pm$ 1368.81 <sup>c</sup>     | 31.31 $\pm$ 9.10        | 345.93 $\pm$ 127.39             | 167.34 $\pm$ 59.10               | 1216.75 $\pm$ 631.24 <sup>d</sup>      | 200.02 $\pm$ 74.52               |
| RANTES              | 5514.35 $\pm$ 1025.96 | 4046.91 $\pm$ 1653.94   | 7879.59 $\pm$ 0.00               | 7879.59 $\pm$ 0.00               | 5253.11 $\pm$ 2626.48            | 7879.59 $\pm$ 0.00                     | 5898.32 $\pm$ 1511.68   | 4990.89 $\pm$ 1770.67           | 7879.59 $\pm$ 0.00               | 7879.59 $\pm$ 0.00                     | 7879.59 $\pm$ 0.00               |

<sup>a</sup>P<0.05

<sup>b</sup>P<0.01

<sup>c</sup>P<0.0005

<sup>d</sup>P<0.0001
